# Supplementary material for: Potamopyrgus antipodarum as a potential defender against swimmer’s itch in European recreational water bodies—experimental study
Source: PeerJ. 2018 Jun 25;6:e5045. doi: 10.7717/peerj.5045 (PMC6022732; doi:10.7717/peerj.5045)
Supplement: Table S2 [file peerj-06-5045-s002.xlsx]

## Sheet: Arkusz1
Supplementary Table S2. The database for effectiveness of parasite invasion to R. balthica at the presence of Potamopyrgus antipodarum (results of Fisher Exact Test)
R. balthica exposed to T. regenti miracidia	without P. antipodarum (control)		with 50 P. antipodarum per one R. balthica		with 100 P. antipodarum per one R. balthica
without P. antipodarum (control)
with 50 P. antipodarum per one R. balthica	1
with 100 P. antipodarum per one R. balthica	0.3034	0.0867
with 200 P. antipodarum per one R. balthica	0.0001	0		0.0108
