# Supplementary material for: Potamopyrgus antipodarum as a potential defender against swimmer’s itch in European recreational water bodies—experimental study
Source: PeerJ. 2018 Jun 25;6:e5045. doi: 10.7717/peerj.5045 (PMC6022732; doi:10.7717/peerj.5045)
Supplement: Table S3 [file peerj-06-5045-s003.xlsx]

## Sheet: Arkusz1
Supplementary Table S3. Survival of Radix balthica infected with Trichobilharzia regenti miracidia in the presence of Potamopyrgus antipodarum
R. balthica exposed to T. regenti miracidia
Control [days]	With 50 P. antipodarum [days]	With 100 P. antipodarum [days]	With 200 P. antipodarum [days]
37	33	38	60
33	40	60	60
33	31	36	60
33	37	54	54
38	37	28	56
54	35	60	60
30	34	32	49
33	38	33	60
33	33	37	60
33	28	18	56
