# Supplementary material for: Potamopyrgus antipodarum as a potential defender against swimmer’s itch in European recreational water bodies—experimental study
Source: PeerJ. 2018 Jun 25;6:e5045. doi: 10.7717/peerj.5045 (PMC6022732; doi:10.7717/peerj.5045)
Supplement: Table S4 [file peerj-06-5045-s004.xlsx]

## Sheet: Arkusz1
Supplementary Table S4. Survival of infected and non–infected Radix balthica
No.	Survival of infected R. balthica [days]	Survival of non-infected R. balthica [days]
1	37	54
2	33	60
3	33	54
4	33	60
5	38	60
6	30	60
7	33	60
8	33	54
9	33	56
10	33	60
11	40	49
12	31	60
13	37	60
14	37	56
15	35	-
16	34	-
17	38	-
18	33	-
19	28	-
20	38	-
21	36	-
22	28	-
23	32	-
24	33	-
25	37	-
26	18	-
